# Supplementary material for: Composite MAX phase/MXene/Ni electrodes with a porous 3D structure for hydrogen evolution and energy storage application
Source: Royal Society of Chemistry journal article supplement (doi:10.1039/d3ra07335a), 2024-01-01

### Electronic Supplementary Information

Figure S1 – XRD of the samples: Mo12 after sintering (before etching), and Mo12Na after etching in 10M NaOH for 10 days (A); Mo6Al<sub>micro</sub> after sintering (before etching), and Mo6Al<sub>micro</sub>NaT70 after etching in 10M NaOH for 15 days at 70 °C (B); Al nano powder.

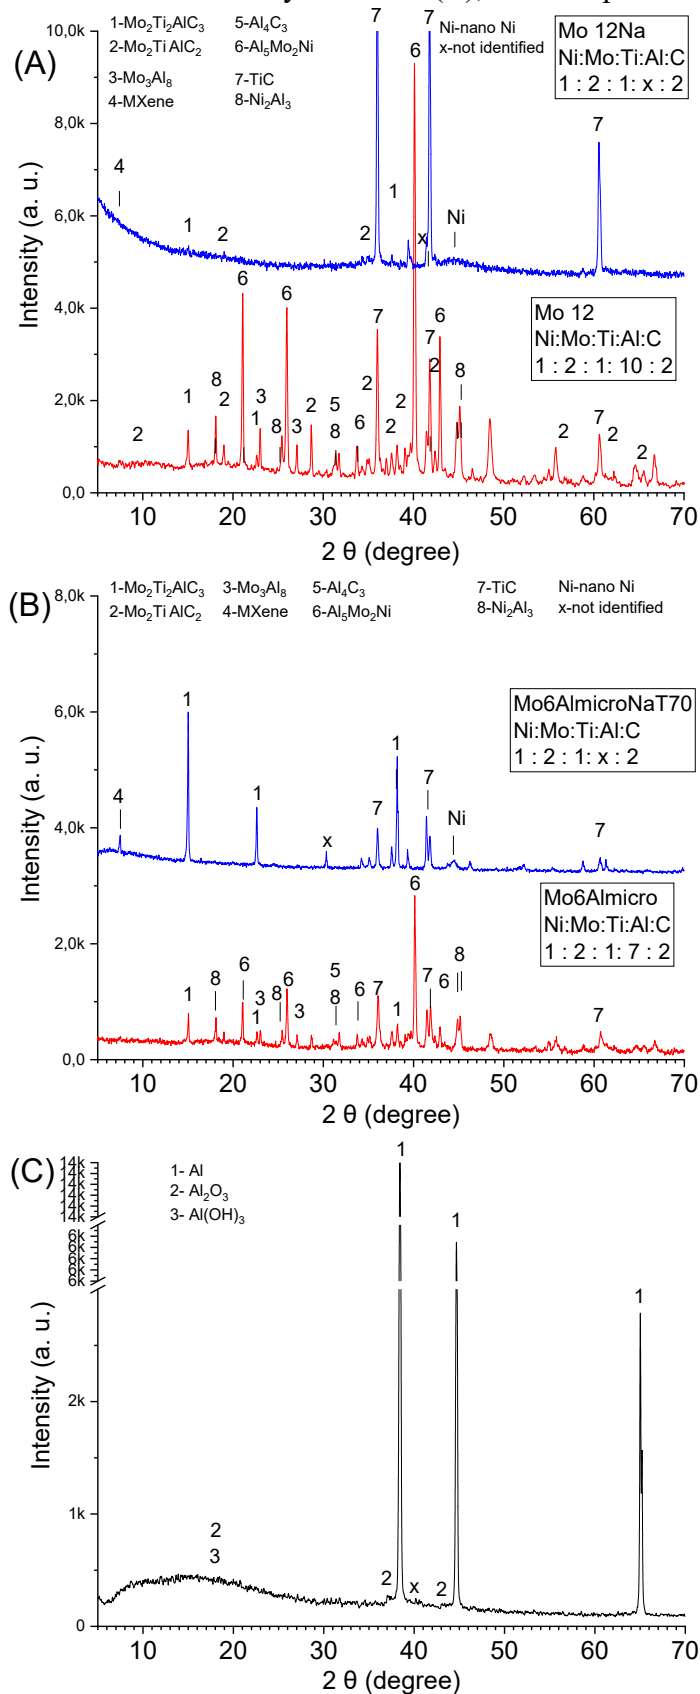

Figure S2 – SEM images of the surface layer of sample Mo6 after sintering (A, B, C, D).

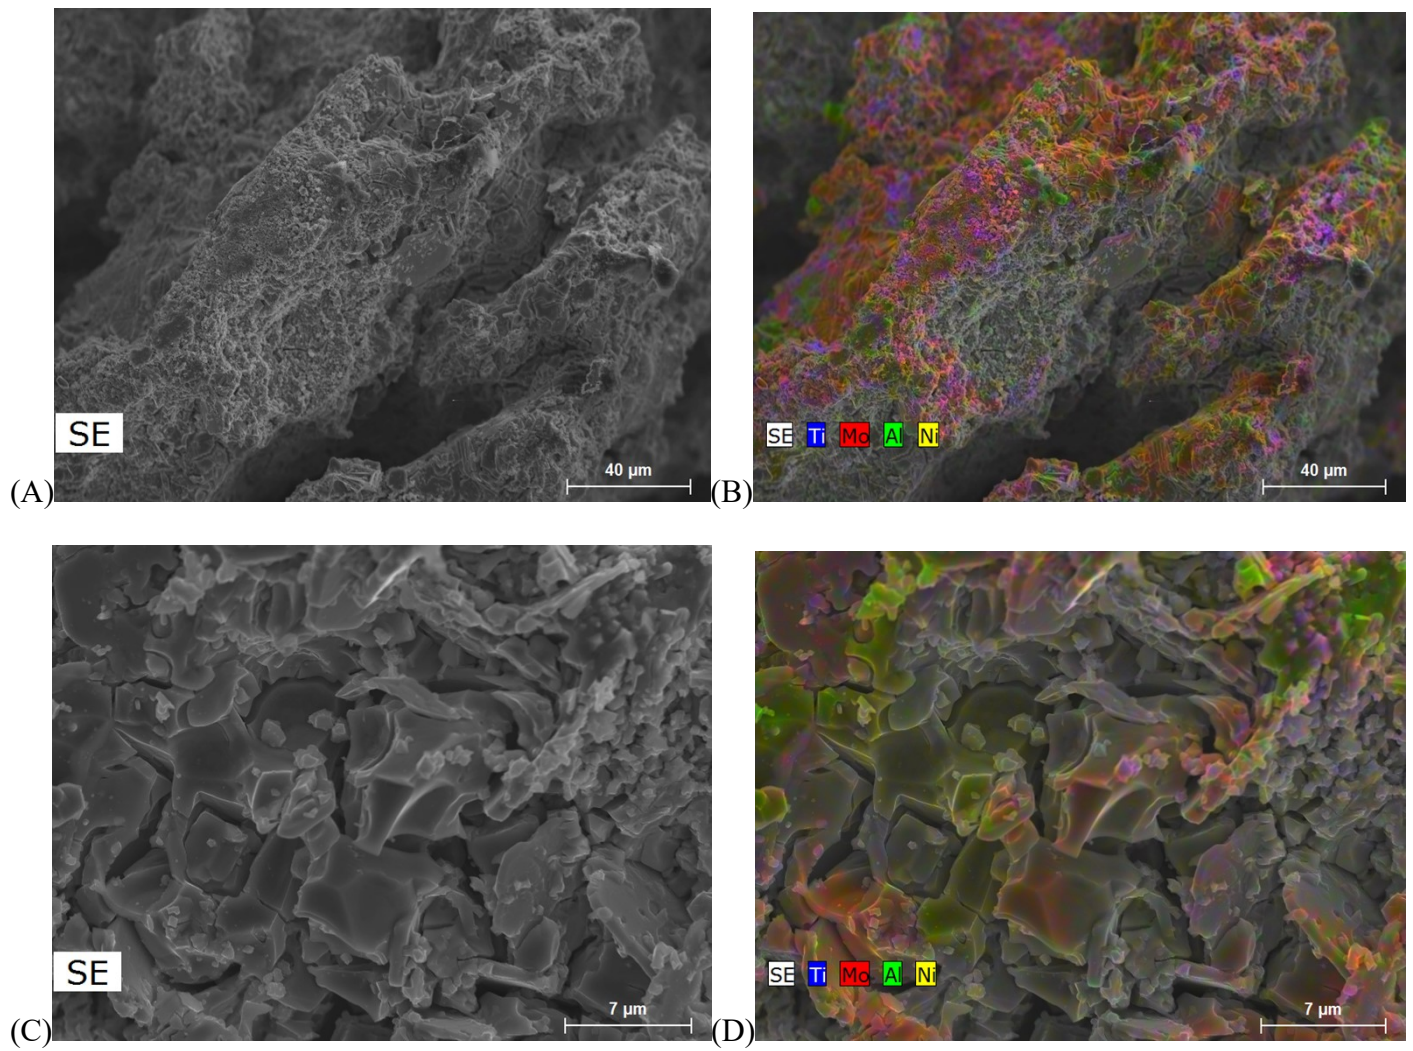

Figure S3 – EDS spectrum of sample Mo5 after sintering. The analysis was performed for the are shown by mapping image.

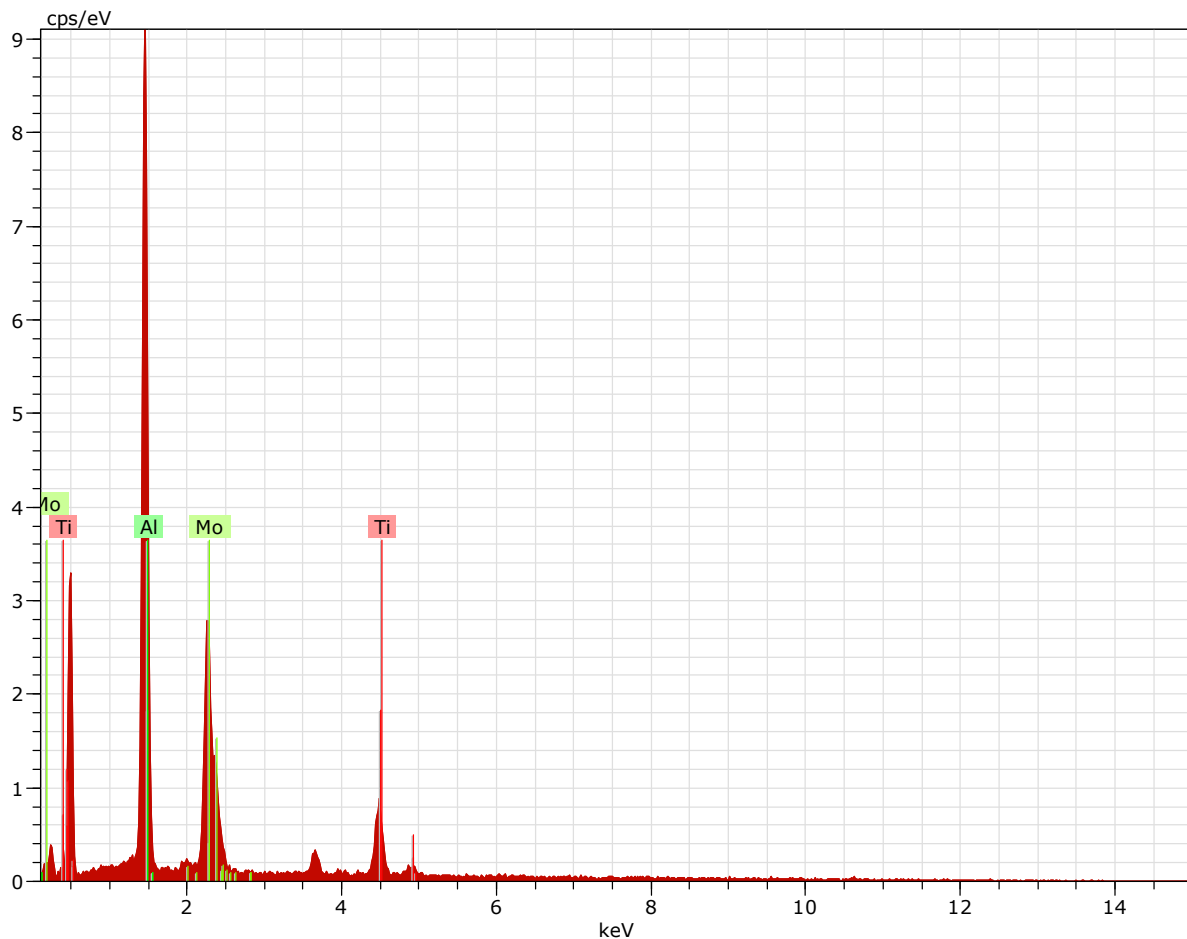

Table S1 – Quantitative results of the EDS analysis of sample Mo5 after sintering.

| Element    | Series   | unn. [wt.%] | C norm. [wt.%] | C Atom. [at.%] | C Error (3 Sigma) [wt.%] |
|------------|----------|-------------|----------------|----------------|--------------------------|
| Titanium   | K-series | 9.40        | 16.46          | 15.08          | 1.10                     |
| Aluminium  | K-series | 22.85       | 40.02          | 65.04          | 3.33                     |
| Molybdenum | L-series | 24.84       | 43.51          | 19.89          | 2.84                     |

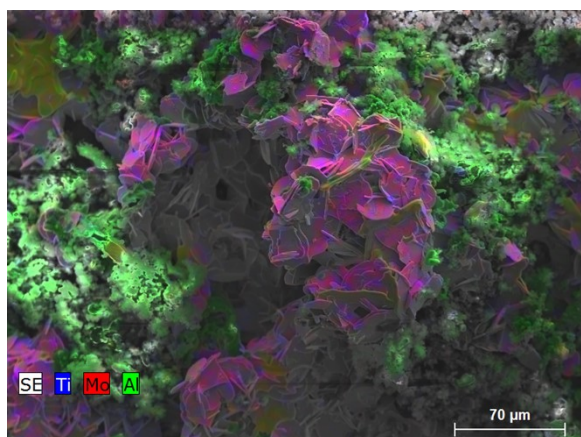

Figure S4 – EDS spectrum of sample Mo5Na after sintering and etching in 10M NaOH.

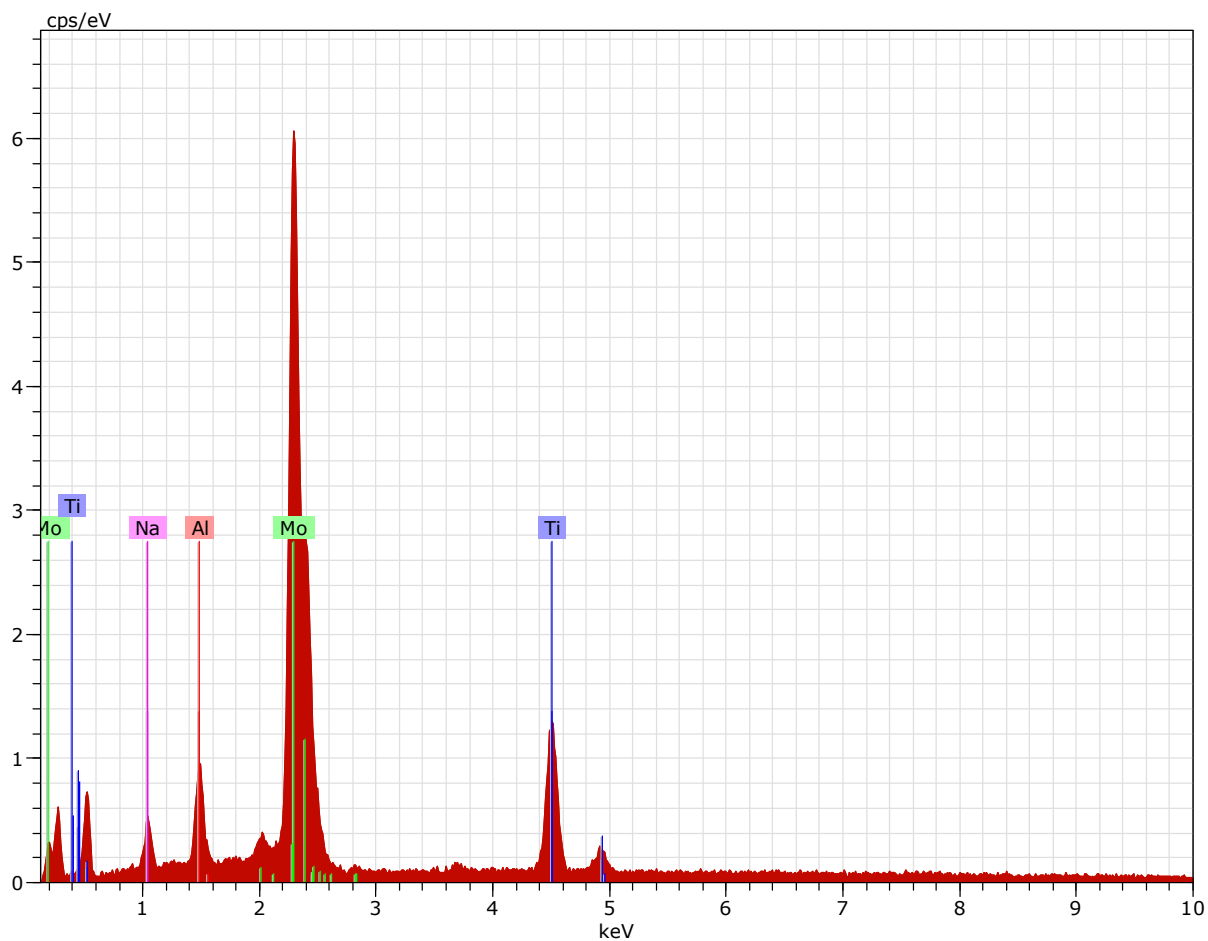

Table S2 – Quantitative results of EDS analysis of sample Mo5Na after sintering and etching in 10M NaOH. SEM image shows the analysed area.

| Element    | Series   | unn.<br>[wt.%] | C norm.<br>[wt.%] | C Atom.<br>[at.%] | C Error (3 Sigma)<br>[wt.%] |
|------------|----------|----------------|-------------------|-------------------|-----------------------------|
| Aluminium  | K-series | 2.10           | 3.02              | 7.89              | 0.41                        |
| Molybdenum | L-series | 50.78          | 72.89             | 53.62             | 5.47                        |
| Titanium   | K-series | 15.48          | 22.22             | 32.76             | 1.52                        |
| Sodium     | K-series | 1.30           | 1.87              | 5.74              | 0.38                        |

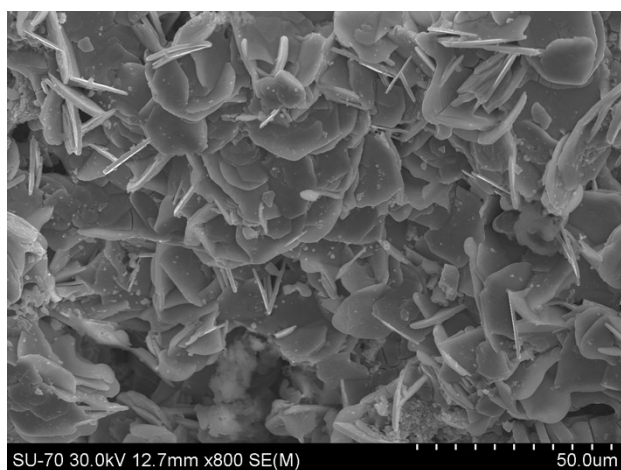

Figure S5 – EDS spectrum of sample Mo6 after sintering.

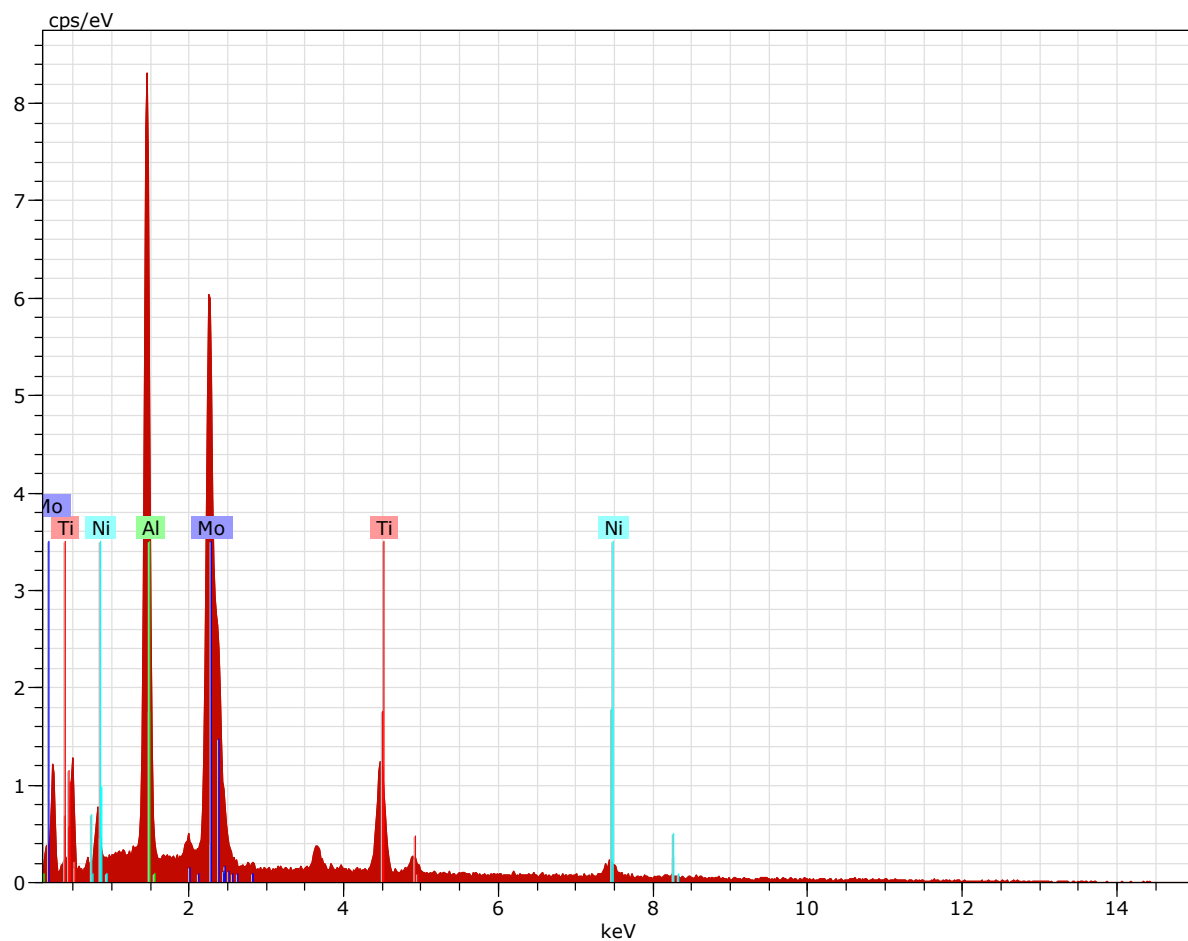

Table S3 – Quantitative results of EDS analysis of sample Mo6 after sintering.

| Element    | Series   | unn.<br>[wt.%] | C norm.<br>[wt.%] | C Atom.<br>[at.%] | C Error (3 Sigma)<br>[wt.%] |
|------------|----------|----------------|-------------------|-------------------|-----------------------------|
| Titanium   | K-series | 10.50          | 14.50             | 16.20             | 1.14                        |
| Aluminium  | K-series | 16.90          | 23.34             | 46.29             | 2.49                        |
| Molybdenum | L-series | 39.23          | 54.18             | 30.22             | 4.30                        |
| Nickel     | K-series | 5.78           | 7.99              | 7.28              | 0.94                        |

Figure S6 – EDS spectrum of sample Mo6Na after sintering and etching in 10M NaOH.

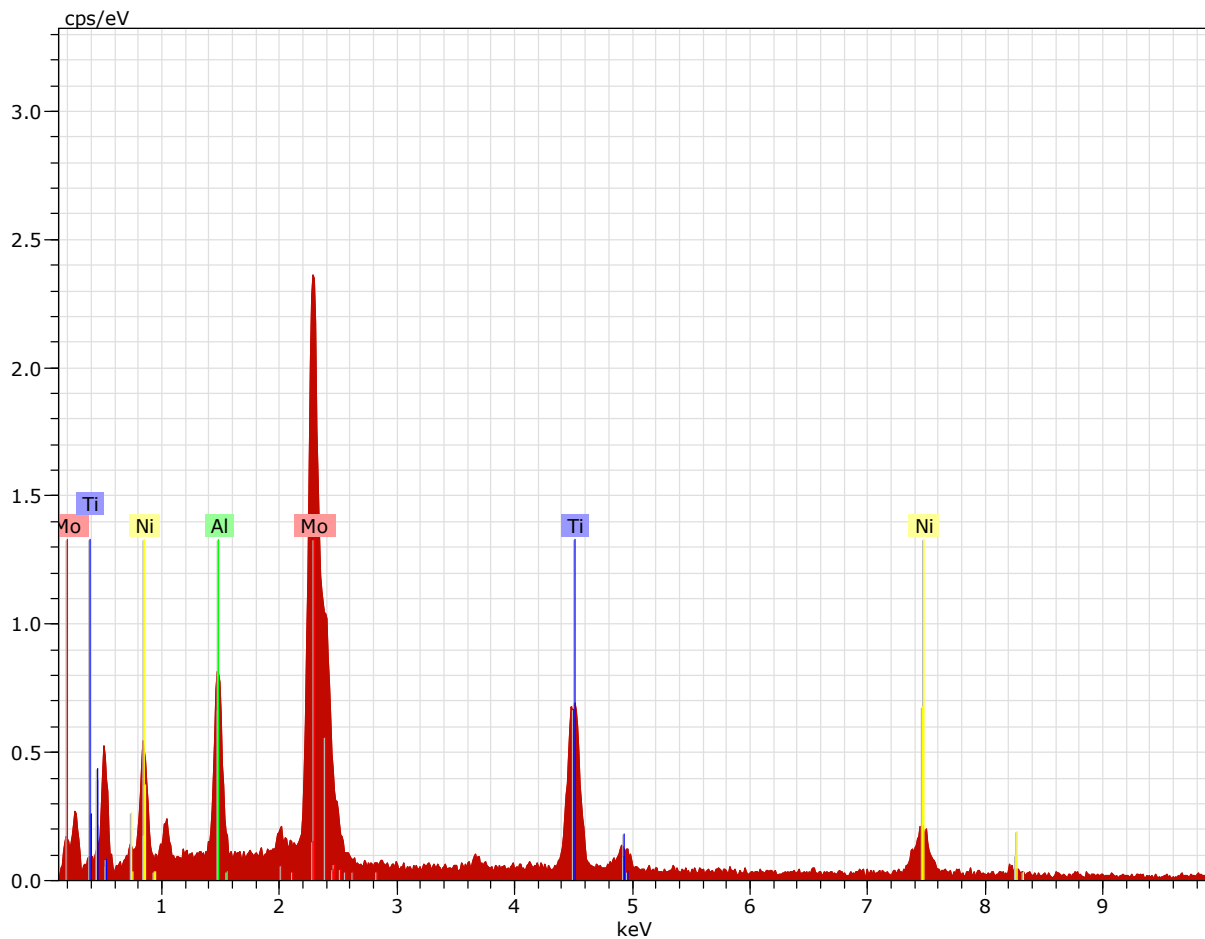

Table S4 – Quantitative results of EDS analysis of sample Mo6Na after sintering and etching in 10M NaOH.

| El | AN | Series   | unn.<br>[wt.%] | C norm.<br>[wt.%] | C Atom.<br>[at.%] | C Error (1 Sigma)<br>[wt.%] |
|----|----|----------|----------------|-------------------|-------------------|-----------------------------|
| Mo | 42 | L-series | 44.95          | 50.83             | 33.56             | 1.65                        |
| Ti | 22 | K-series | 18.70          | 21.14             | 27.97             | 0.64                        |
| Ni | 28 | K-series | 19.06          | 21.55             | 23.26             | 0.79                        |
| Al | 13 | K-series | 5.73           | 6.48              | 15.22             | 0.33                        |

Figure S7 – CV curve of electrode Mo6Na after 4 days electrolysis at scan rate of 1 mVs<sup>-1</sup>.

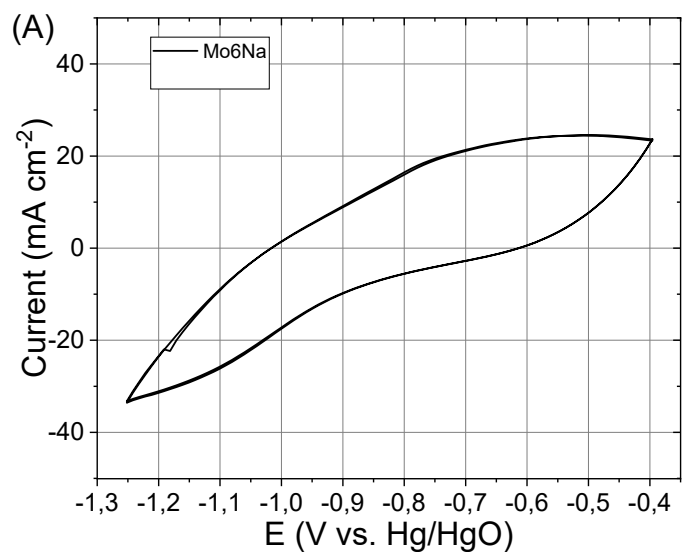

Supplement: d3ra07335a1.pdf [file d3ra07335a1.pdf]
